# Supplementary material
Source: PubMed Central journal article supplement (PMC2637551)
Supplement: NIHMS27601-supplement-02.pdf [file NIHMS27601-supplement-02.pdf]

|       |                                                                                       |     |
|-------|---------------------------------------------------------------------------------------|-----|
| SCN1A | ccactagatggcgatgtaatgtaaggtgctgtc-----ttgactttttttttttttttttttgaaacaagctat ttgctGATTT | 77  |
| SCN2A | ..gg.....a.c...c.....a.....c-----t.t.a...a.....c.aa.tt.g.t...g...t.a.cag              | 77  |
| SCN3A | ..g.....g..acc..ct.tga...ga..ggcct.ttt.c...c.....cctca.....g...t.....a.               | 82  |
| SCN1A | GTATTAGGTACCATAGAGTG-----AGGCGAGGATG-AAGCCGAGAGGATACTGCAGAGGTCTCTGGTGCATG             | 144 |
| SCN2A | ac...g.....c..a..actgtcAGAACAGA.A.T.A.GCA...GA.G.....G...TG.TCA..CT.T-----            | 151 |
| SCN3A | a.g.g.....actgtcagAACAGA.A...GA.GCAT...A.....T...G.A.....-----                        | 155 |
| SCN1A | TGTGTATGTGTGCGTTTGTGTGTGTTGTGTGTCTGTGTGTTCTGCCCCAGTGAGACTGCAG-----CCCTTGTAATACT       | 220 |
| SCN2A | -----C...T.T-----...T.TTT.A...GA.AG.....A.A..G.G..T.                                  | 195 |
| SCN3A | -----...T-----...TAT...CA...AA.A.AGAAAAAAAAA.....C.A.                                 | 203 |
| SCN1A | TTGACACCTTTTGC-----AAGAAGGAATCTGAACAATTGCAACTGAAGGCACATTGTTATCATCTCGTC                | 285 |
| SCN2A | ..ACTTT..AC.C-----GT..AA.T.....G.....TTG..GA--CTG..A.AT...A.A.A.A                     | 258 |
| SCN3A | ..TA.A.C.C..TGGTCAAAAAAAAAAAAAA..A..AA..G.....GC...GAG...A...G..A.ACC.TAAC.A..        | 285 |
| SCN1A | TTTGGGT--GATGCTGTTCTCACTGCA---GATGGATAATTTTCCTTTTAATCAGgtaagccatctaattgtttcatct       | 360 |
| SCN2A | CG...A.TCTG..T.A.GAT.T-----T...ATT.....g.atga--ct.t.                                  | 321 |
| SCN3A | ..G-----GG.T.TGT.ATGCTGTA..TC...GGC..TG..T.....tga.a..aca.....                        | 360 |

Supplementary Figure 1
